# Supplementary material for: Assessment of faecal microbial transfer in irritable bowel syndrome with severe bloating
Source: PubMed Central journal article supplement — Gut. 2016 Aug 10;66(5):980–2. doi: 10.1136/gutjnl-2016-312513 (PMC5531219; doi:10.1136/gutjnl-2016-312513), 2016-08-10
Supplement: gutjnl-2016-312513supp001.pdf [file gutjnl-2016-312513supp001.pdf]

## 1 SUPPLEMENTAL MATERIALS AND METHODS

### 2 Patient inclusion

3 In this prospective pilot study, patients with refractory IBS, aged between 18 and 75 years, were  
4 recruited in a tertiary hospital centre. Only patients with symptoms of intermittent diarrhoea and  
5 severe bloating were eligible for this trial. Exclusion criteria were the previous diagnosis of  
6 coeliac disease, lactose intolerance (unless on a stable diet for more than 3 months), prior  
7 gastro-intestinal surgery, antibiotic use within 3 months of inclusion or pregnancy. Patients with  
8 serious comorbidity and/or a psychiatric history were also excluded from the trial as per the  
9 including physician's discretion. Written informed consent was obtained from all patients and  
10 donors prior to study inclusion. The Ethics Committee of the Ghent University Hospital approved  
11 this study (EC2013/596).

12

### 13 Study outline

14 Eligible patients underwent a screening visit at the outpatient clinic. The severity of IBS and  
15 quality of life were assessed by means of a daily symptom diary collected over a period of 14  
16 days and by standardized questionnaires, respectively. Following the FMT, patients were  
17 monitored for three months with scheduled visits to the outpatient clinic at 4, 8 and 12 weeks  
18 post-transplantation. A follow-up consultation 1 year after the FMT was performed.

19

### 20 Donor selection

21 Healthy donors, who were selected by the patients themselves, provided donor samples. Donors  
22 were required to be in good overall condition, to be between 18 and 65 years of age, to have  
23 normal, regular bowel movements and to have no gastrointestinal symptoms. Exclusion criteria  
24 for donors included body mass index (BMI) > 30, antibiotic use in the past 6 months, chronic  
25 disease or abnormal screening results. Following a clinical examination at the outpatient clinic,  
26 donors were screened for various transmittable diseases. Serological screening included testing  
27 for hepatitis A, B and C, HIV-1 and 2 and *Treponema pallidum*. Donor stools were screened by  
28 culturing for the presence of *Salmonella* spp., *Shigella* spp., *Yersinia enterocolitica*, *Yersinia*  
29 *pseudotuberculosis*, *Campylobacter* spp., *Clostridium difficile* and *Aeromonas* spp. Additionally,  
30 specific screening for antibiotic-resistant strains was performed using the active detection of  
31 carbapenemase-producing *Enterobacteriaceae* (CPE) and extended spectrum beta-lactamase  
32 (ESBL) producing organisms. Microscopic examination was performed to confirm the absence of

33 eggs, cysts and/or larvae of parasites, and the presence of Clostridium difficile toxins A and B  
34 was screened using an enzyme immuno-assay.

35

### 36 **FMT procedure**

37 Fresh donor stools were collected on the day of transplantation, stored at 4°C and processed  
38 within 6 hours, as previously described. [1] Briefly, 300 mL of 0.9% NaCl was added to the stool  
39 sample and thoroughly mixed using a handheld blender. The resulting suspension was filtered  
40 and transferred into 60 mL syringes. All procedures were performed under laminar airflow  
41 conditions. Prior to transplantation, patients underwent a bowel preparation using macrogol. The  
42 FMT was performed by means of colonoscopy with an injection of 300 mL of the donor faeces  
43 suspension into the terminal ileum and caecum. Following the transplantation, patients were  
44 kept sober and under close observation in a supine position for four hours. A dose of 2 mg  
45 loperamide was administered both prior to and following transplantation.

46

### 47 **Primary and secondary endpoints**

48 The primary endpoint of this pilot study was the relief of global IBS symptoms and abdominal  
49 bloating at 12 weeks following the FMT. Adequate relief was defined as a positive answer to two  
50 key questions: '1) Do you feel improvement in your overall IBS symptoms since transplantation?'  
51 and '2) Do you feel improvement in your sensation of bloating since transplantation?'.  
52

53

54 The secondary endpoints were as follows: 1) changes in daily assessed IBS symptoms of  
55 abdominal discomfort, abdominal pain, abdominal bloating, flatulence, stool consistency, number  
56 of defecations and abdominal circumference; 2) changes of quality of life; and 3) changes of  
57 faecal microbiota composition.

58

### 59 **Evaluation of clinical endpoints**

60 IBS-related symptoms were assessed using a daily symptom diary (supplementary table 1) that  
61 evaluated general abdominal discomfort, abdominal bloating, abdominal pain and flatulence on a  
62 scale of one to six. In addition, the number of daily bowel movements, the consistency of the  
63 stools and the abdominal circumference (measured at the umbilicus by patients themselves at  
64 exactly the same time every day) were assessed as well. Quality of life was assessed using a  
65 standardized, IBS-specific quality of life questionnaire (IBS-QoL) in the patient's native  
language.

66

**67 Microbiome analysis**

68 Consecutive faecal samples were collected for microbiome analyses. Stool samples of patients  
69 and donors were collected before the FMT (at baseline) and at selected time-points after  
70 treatment. Samples were immediately stored at -20°C and transferred to -80°C within one week.  
71 DNA was extracted from the frozen faecal samples using the PowerMicrobiome RNA Isolation  
72 Kit (MOBIO Laboratories Inc.) as previously described. [2] Bacterial and archaeal 16S rRNA  
73 genes were amplified using the 515F/806R primer set targeting the V4 hypervariable region  
74 according to Caporaso and colleagues. [3] Sequencing was performed using the Illumina MiSeq  
75 platform with sequencing kit MiSeq v2, producing 250 bp paired-end reads.

76

**77 16S data processing**

78 Sequence analysis was performed according to Geirnaert and colleagues. [4] FLASH<sup>16</sup>-merged  
79 sequences were subject to quality filtering using the FASTX-toolkit, and chimaera removal was  
80 performed using UCHIME. [5,6] Samples were rarefied to 10,000 reads; then, the taxonomical  
81 classifications of sequences were performed using an RDP classifier [7] to generate phylum to  
82 genus level composition matrices. Bootstrap values from the RDP classifier were used to identify  
83 sequences with high-confidence genus assignments (bootstrap value >0.8), whereas sequences  
84 classified with lower confidence were binned at the family level (labelled unclassified family). A  
85 species-level matrix was generated using *de novo* OTU clustering with the UPARSE pipeline [8]  
86 and a 97% identity threshold.

87

**88 Statistical analysis**

89 Statistical analysis was performed using SPSS Statistics version 22 (Chicago, USA). Wilcoxon  
90 signed ranks test and the Mann-Whitney U test were used for analysis of paired and non-paired  
91 data, respectively. Two-tailed probabilities were calculated and *p*-values of less than 0.05 were  
92 considered statistically significant.

93

94

95

96

97 **REFERENCES**

- 98 1 van Nood E, Vrieze A, Nieuwdorp M, *et al.* Duodenal Infusion of Donor Feces for Recurrent  
99 Clostridium difficile. *N Engl J Med* 2013;**368**:407–15. doi:10.1056/NEJMoa1205037
- 100 2 Falony G, Joossens M, Vieira-Silva S, *et al.* Population-level analysis of gut microbiome variation.  
101 *Science* 2016;**352**:560–4. doi:10.1126/science.aad3503
- 102 3 Caporaso JG, Lauber CL, Walters WA, *et al.* Ultra-high-throughput microbial community analysis on  
103 the Illumina HiSeq and MiSeq platforms. *The ISME Journal* 2012;**6**:1621–4. doi:10.1038/ismej.2012.8
- 104 4 Geirnaert A, Wang J, Tinck M, *et al.* Interindividual differences in response to treatment with  
105 butyrate-producing *Butyricicoccus pullicaecorum* 25-3T studied in an in vitro gut model. *FEMS*  
106 *Microbiol Ecol* 2015;**91**:fiv054–4. doi:10.1093/femsec/fiv054
- 107 5 Magoč T, Salzberg SL. FLASH: fast length adjustment of short reads to improve genome assemblies.  
108 *Bioinformatics* 2011;**27**:2957–63. doi:10.1093/bioinformatics/btr507
- 109 6 Edgar RC, Haas BJ, Clemente JC, *et al.* UCHIME improves sensitivity and speed of chimera detection.  
110 *Bioinformatics* 2011;**27**:2194–200. doi:10.1093/bioinformatics/btr381
- 111 7 Wang Q, Garrity GM, Tiedje JM, *et al.* Naive Bayesian classifier for rapid assignment of rRNA  
112 sequences into the new bacterial taxonomy. *Appl Environ Microbiol* 2007;**73**:5261–7.  
113 doi:10.1128/AEM.00062-07
- 114 8 Edgar RC. UPARSE: highly accurate OTU sequences from microbial amplicon reads. *Nat Methods*  
115 2013;**10**:996–8. doi:10.1038/nmeth.2604
- 116
