# Supplementary material for: Assessment of faecal microbial transfer in irritable bowel syndrome with severe bloating
Source: PubMed Central journal article supplement — Gut. 2016 Aug 10;66(5):980–2. doi: 10.1136/gutjnl-2016-312513 (PMC5531219; doi:10.1136/gutjnl-2016-312513), 2016-08-10
Supplement: gutjnl-2016-312513supp002.pdf [file gutjnl-2016-312513supp002.pdf]

**Supplementary Table 1:** Patients' and donors' characteristics and comparison of the baseline characteristics of the responders and the non-responders

|                              | <b>Patients</b>                      | <b>Donors</b>                                                     | <b>Responders</b>                                                 | <b>Non-responders</b>                                            | <b>p-value</b> |
|------------------------------|--------------------------------------|-------------------------------------------------------------------|-------------------------------------------------------------------|------------------------------------------------------------------|----------------|
| <b>N</b>                     | 12                                   | 12                                                                | 9                                                                 | 3                                                                | NA             |
| <b>Age</b> (median (range))  | 35 (23-53)                           | 37 (21-57)                                                        | 31 (23 – 53)                                                      | 45 (28-51)                                                       | 0.282          |
| <b>Sex</b>                   | Male: N=4 (30%)<br>Female: N=8 (70%) | Male: N=7 (58%)<br>Female: N=5 (42%)                              | Male: N=3 (33%)<br>Female: N=6 (67%)                              | Male: N=1 (33%)<br>Female: N=2 (67%)                             | 0.764          |
| <b>BMI</b> (median (range))  | 20.4 (18.7-33.8)                     | 20.5 (18.5-25.5)                                                  | 20.5 (18.7 – 34.0)                                                | 19.4 (18.6 – 22.7)                                               | 0.282          |
| <b>IBS duration</b> (years)  | 14.5 (0.5-40)                        | NA                                                                | 13 (0.5 – 35)                                                     | 31 (10-40)                                                       | 0.229          |
| <b>Psychotropic drug use</b> | N=3 (25%)                            | NA                                                                | N=2 (29%)                                                         | N=1 (33%)                                                        | 0.724          |
| <b>Relationship</b>          | NA                                   | Partner: N=6 (50%)<br>Relative: N=2 (17%)<br>Unrelated: N=4 (33%) | Partner: N=5 (56%)<br>Relative: N=2 (22%)<br>Unrelated: N=2 (22%) | Partner: N=1 (33%)<br>Relative: N=0 (0%)<br>Unrelated: N=2 (66%) | NA             |
