# Supplementary material for: Assessment of faecal microbial transfer in irritable bowel syndrome with severe bloating
Source: PubMed Central journal article supplement — Gut. 2016 Aug 10;66(5):980–2. doi: 10.1136/gutjnl-2016-312513 (PMC5531219; doi:10.1136/gutjnl-2016-312513), 2016-08-10
Supplement: gutjnl-2016-312513supp004.pdf [file gutjnl-2016-312513supp004.pdf]

**Supplementary Table 3:** Baseline differences in the IBS symptoms and characteristics of responders and non-responders that were included in the microbiota analyses.

|                                                                 | <b>Responders baseline</b>             | <b>Non-responders baseline</b> | <b>p-value</b> |
|-----------------------------------------------------------------|----------------------------------------|--------------------------------|----------------|
| <b>N</b>                                                        | 5                                      | 3                              |                |
| <b>Abdominal discomfort score</b><br>median (minimum-maximum)   | 3.86 (2.78 – 5.57)                     | 5.25 (4.92 – 5.57)             | 0.190          |
| <b>Number of daily defecations</b><br>median (minimum-maximum)  | 1.8 (1-3)                              | 7.23 (3.71 – 10.78)            | 0.095          |
| <b>Stool consistency</b><br>median (minimum-maximum)            | 3.18 (2.14-4.14)                       | 4.39 (4.00 – 4.78)             | 0.381          |
| <b>Urgency</b><br>median (minimum-maximum)                      | 0.64 (0.28-0.79)                       | 1 (1 – 1)                      | 0.095          |
| <b>Abdominal pain</b><br>median (minimum-maximum)               | 3.56 (2.71-4.57)                       | 4 (3.14 – 4.86)                | 0.571          |
| <b>Abdominal bloating</b><br>median (minimum-maximum)           | 4.00 (2.14-5.21)                       | 4.89 (4.64 – 5.14)             | 0.381          |
| <b>Flatulence</b><br>median (minimum-maximum)                   | 3.93 (2.79-5.28)                       | 4.89 (4.64 – 5.14)             | 0.381          |
| <b>Abdominal circumference (cm)</b><br>median (minimum-maximum) | 84.96 (78.57-93.96)                    | 86.07 (82.64 – 89.50)          | 1.000          |
| <b>Quality of life</b><br>median (minimum-maximum)              | 44.85 (41.18-50.00)                    | 28.30 (25.74 – 30.88)          | 0.095          |
| <b>Age (years)</b><br>median (minimum-maximum)                  | 36.6 (24-53)                           | 39.5 (28 – 51)                 | 0.857          |
| <b>Sex</b>                                                      | 2 M<br>3F                              | 1 M<br>1F                      | 0.714          |
| <b>BMI</b><br>median (minimum-maximum)                          | 23.85 (19.05-33.96)                    | 20.65 (18.62 – 22.68)          | 0.571          |
| <b>IBS duration (years)</b><br>median (minimum-maximum)         | 17.6 (6-35)                            | 25 (10 – 40)                   | 0.800          |
| <b>Psychofarmaca use</b>                                        | 0                                      | 0                              | NA             |
| <b>Relationship</b>                                             | 2 partners<br>2 unrelated<br>1 sibling | 1 partner<br>1 unrelated       |                |
